# Supplementary material for: Surface-dependent band structure variations and bond-level deviations in Cu2O
Source: Royal Society of Chemistry journal article supplement (doi:10.1039/d1qi00733e), 2021-01-01
Supplement: d1qi00733e1.pdf [file d1qi00733e1.pdf]

Electronic Supplementary Information

**Surface-dependent band structure variations and bond-level deviations of Cu<sub>2</sub>O**

Chih-Shan Tan<sup>\*a</sup> and Michael H. Huang<sup>\*b</sup>

<sup>a</sup>*Institute of Electronics, National Yang Ming Chiao Tung University, Hsinchu 30010, Taiwan*

<sup>b</sup>*Department of Chemistry and Frontier Research Center on Fundamental and Applied Sciences of Matters, National Tsing Hua University, Hsinchu 30013, Taiwan*

**Table of contents**

|          |                                                                                                                                   |    |
|----------|-----------------------------------------------------------------------------------------------------------------------------------|----|
| Fig. S1  | Band structure and DOS diagram of the Cu <sub>2</sub> O primitive cell                                                            | 3  |
| Fig. S2  | Band structures of 1–9 layers of Cu <sub>2</sub> O (100) planes obtained using slabs from a 3 × 3 × 3 Cu <sub>2</sub> O supercell | 4  |
| Fig. S3  | DOS diagrams of 1–9 layers of Cu <sub>2</sub> O (100) planes obtained using slabs from a 3 × 3 × 3 Cu <sub>2</sub> O supercell    | 4  |
| Fig. S4  | Slab structures of 1–9 layers of Cu <sub>2</sub> O (100) planes                                                                   | 5  |
| Fig. S5  | Slab structures of 1–9 layers of Cu <sub>2</sub> O (111) planes                                                                   | 5  |
| Fig. S6  | Slab structures of 1–9 layers of Cu <sub>2</sub> O (110) planes                                                                   | 6  |
| Fig. S7  | Band structures of 1–9 layers of Cu <sub>2</sub> O (111) planes obtained using slabs from a 3 × 3 × 3 Cu <sub>2</sub> O supercell | 6  |
| Fig. S8  | Band structures of 1–9 layers of Cu <sub>2</sub> O (110) planes obtained using slabs from a 3 × 3 × 3 Cu <sub>2</sub> O supercell | 7  |
| Fig. S9  | Band structures of 1–9 layers of Cu <sub>2</sub> O (111) planes obtained using slabs from a 1 × 1 × 1 Cu <sub>2</sub> O supercell | 8  |
| Fig. S10 | DOS diagrams of 1–9 layers of Cu <sub>2</sub> O (111) planes obtained using slabs from a 1 × 1 × 1 Cu <sub>2</sub> O supercell    | 9  |
| Fig. S11 | Band structures of 1–9 layers of Cu <sub>2</sub> O (111) planes obtained using slabs from a 2 × 2 × 2 Cu <sub>2</sub> O supercell | 9  |
| Fig. S12 | DOS diagrams of 1–9 layers of Cu <sub>2</sub> O (111) planes obtained using slabs from a 2 × 2 × 2 Cu <sub>2</sub> O supercell    | 10 |
| Fig. S13 | Band structures of 1–9 layers of Cu <sub>2</sub> O (111) planes obtained using slabs from a 4 × 4 × 4 Cu <sub>2</sub> O supercell | 10 |
| Fig. S14 | DOS diagrams of 1–9 layers of Cu <sub>2</sub> O (111) planes obtained using slabs from a 4 × 4 × 4 Cu <sub>2</sub> O supercell    | 11 |
| Fig. S15 | Band structures of 1–9 layers of Cu <sub>2</sub> O (111) planes obtained using slabs from a 5 × 5 × 5 Cu <sub>2</sub> O supercell | 11 |
| Fig. S16 | DOS diagrams of 1–9 layers of Cu <sub>2</sub> O (111) planes obtained using slabs from a 5 × 5 × 5 Cu <sub>2</sub> O supercell    | 12 |
| Fig. S17 | Partial DOS diagrams of 1–3 layers of Cu <sub>2</sub> O (100), (110), and (111)                                                   |    |

|                                                                                                                                       |    |
|---------------------------------------------------------------------------------------------------------------------------------------|----|
| Planes                                                                                                                                | 13 |
| Table S1 Enthalpy variations using different starting points to calculate band structures of 1 layer of Cu <sub>2</sub> O (111) plane | 3  |
| Table S2 Band gap variation with respect to the number of plane layers                                                                | 7  |
| Table S3 Cu <sub>2</sub> O layer thicknesses vs. the number of plane layers                                                           | 8  |
| Table S4 Average Cu–O bond length variation with respect to the number of plane layers                                                | 12 |
| Table S5 Cu–O bond distortion percentages                                                                                             | 13 |

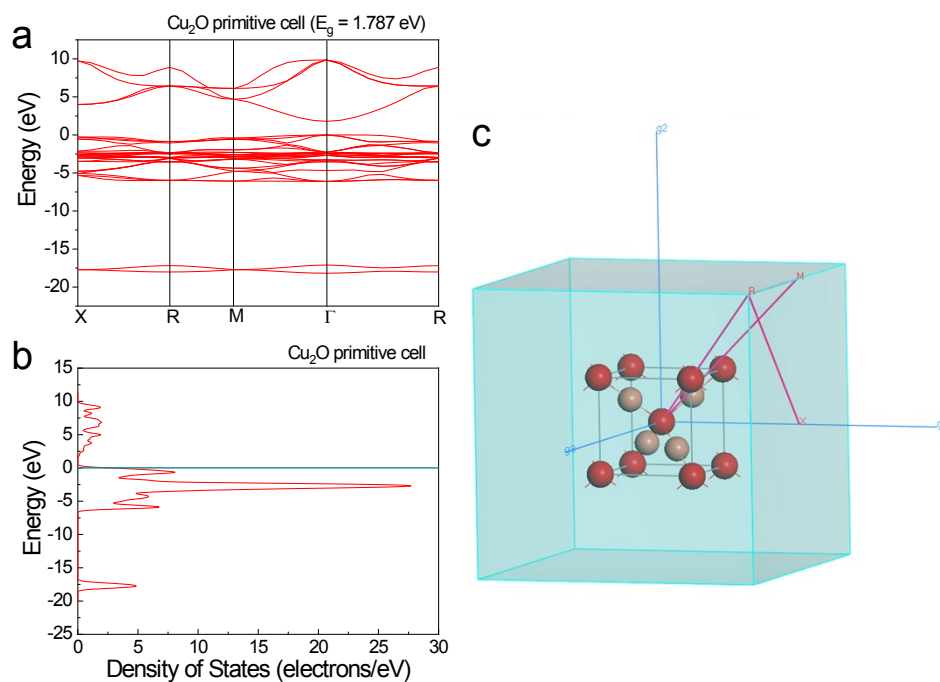

**Fig. S1** (a) Band structure and (b) DOS diagram of the  $\text{Cu}_2\text{O}$  primitive cell. (c)  $\text{Cu}_2\text{O}$  primitive cell with Brillouin zone. Pink spheres are O atoms and red spheres are Cu atoms.

**Table S1** Enthalpy variations using different starting points to calculate band structures of 1 layer of  $\text{Cu}_2\text{O}$  (111) plane from a  $3 \times 3 \times 3$  supercell.

| $\text{Cu}_2\text{O}$ 3x3x3 1 layer | Enthalpy (eV) |
|-------------------------------------|---------------|
| Slab starts at 0                    | -6775.50      |
| Slab starts at 0.167                | -6757.08      |
| Slab starts at 0.25                 | -6757.08      |
| Slab starts at 0.333                | -6775.50      |
| Slab starts at 0.5                  | -6757.08      |
| Slab starts at 0.583                | -6757.08      |
| Slab starts at 0.667                | -6775.50      |
| Slab starts at 0.883                | -6757.09      |
| Slab starts at 0.917                | -6757.09      |

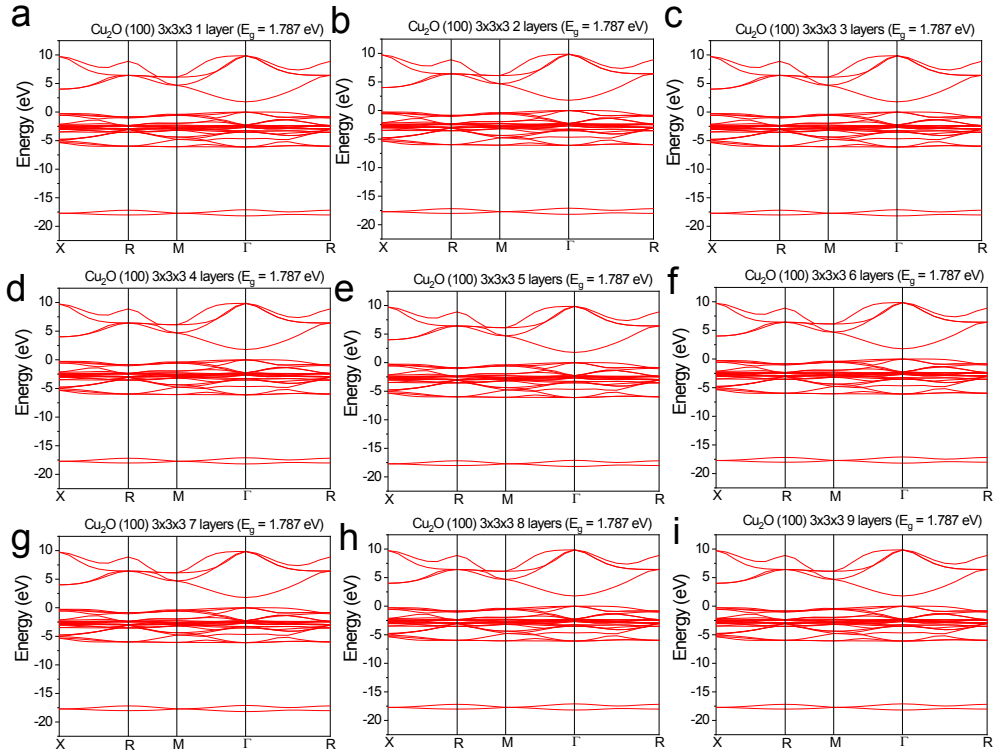

**Fig. S2** Band structures of (a) 1, (b) 2, (c) 3, (d) 4, (e) 5, (f) 6, (g) 7, (h) 8, and (i) 9 layers of  $\text{Cu}_2\text{O}$  (100) planes obtained using slabs from a  $3 \times 3 \times 3$   $\text{Cu}_2\text{O}$  supercell.

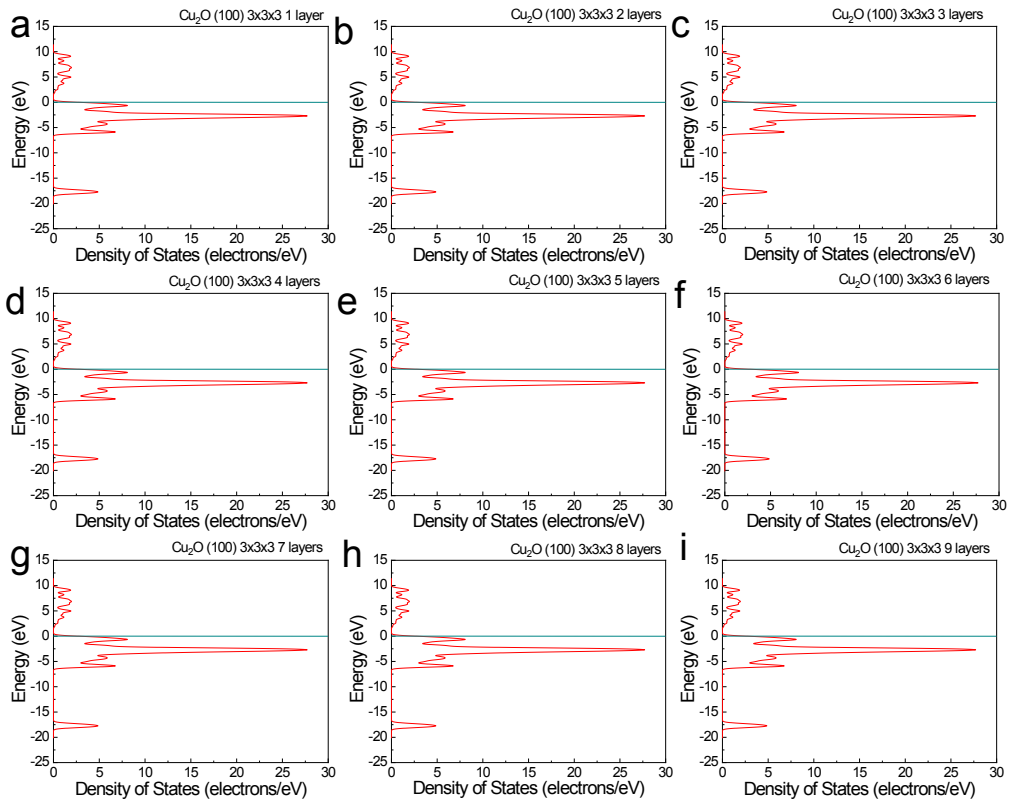

**Fig. S3** DOS diagrams of (a) 1, (b) 2, (c) 3, (d) 4, (e) 5, (f) 6, (g) 7, (h) 8, and (i) 9 layers of  $\text{Cu}_2\text{O}$  (100) planes obtained using slabs from a  $3 \times 3 \times 3$   $\text{Cu}_2\text{O}$  supercell.

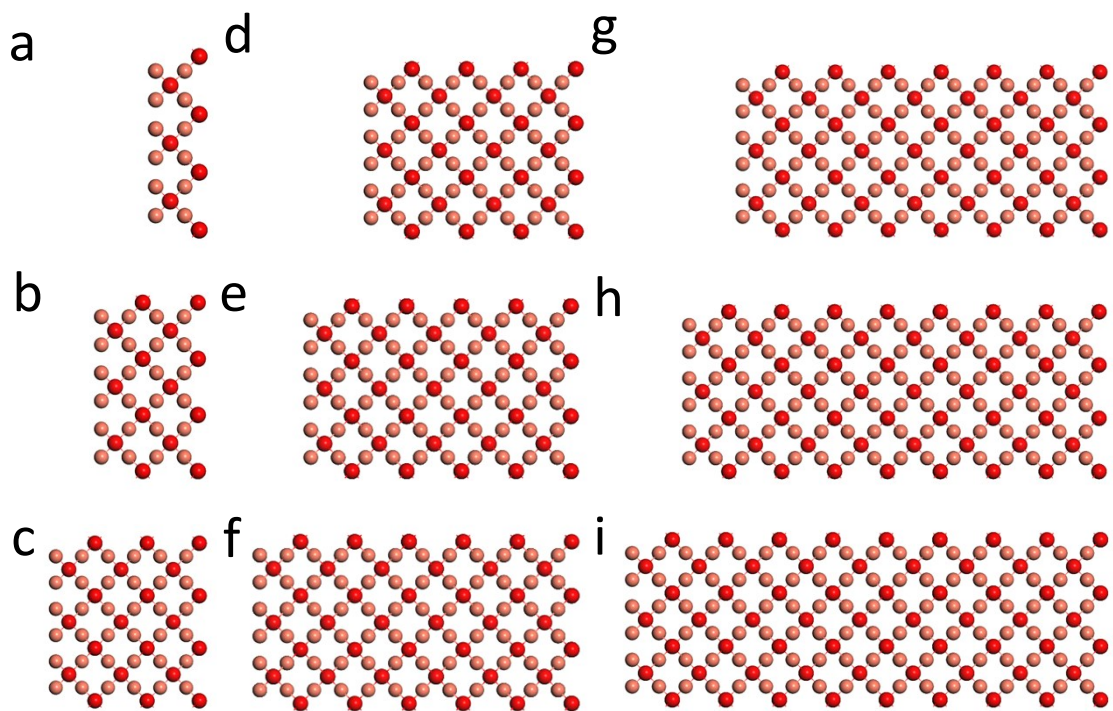

**Fig. S4** Slab structures of 1–9 layers of  $\text{Cu}_2\text{O}$  (100) planes.

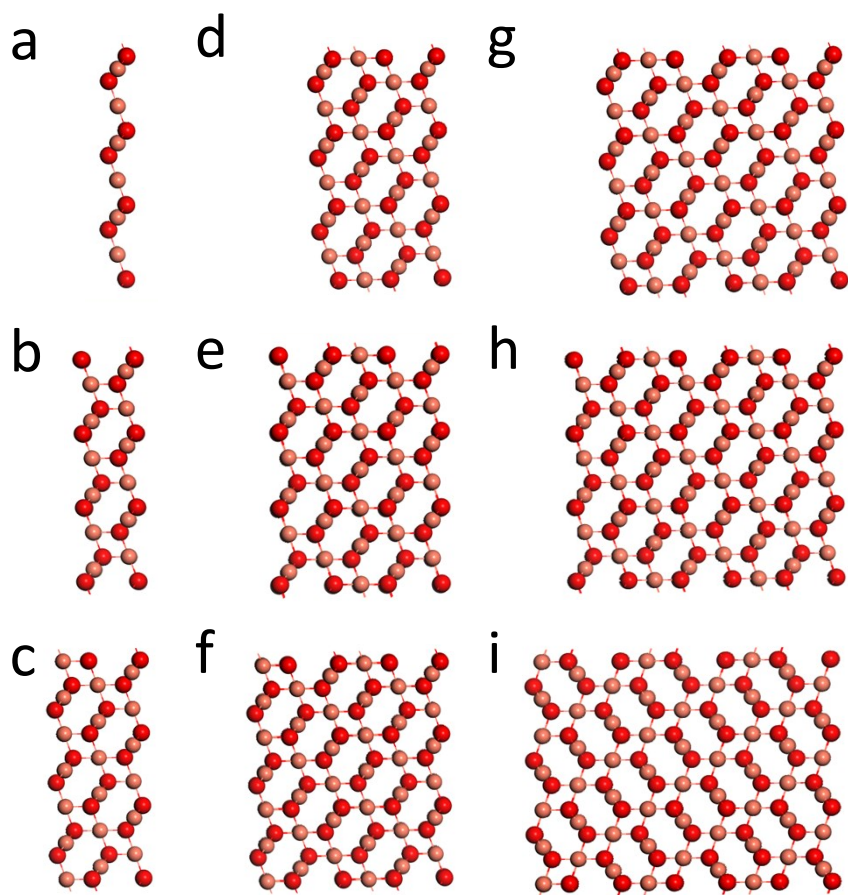

**Fig. S5** Slab structures of 1–9 layers of  $\text{Cu}_2\text{O}$  (111) planes.

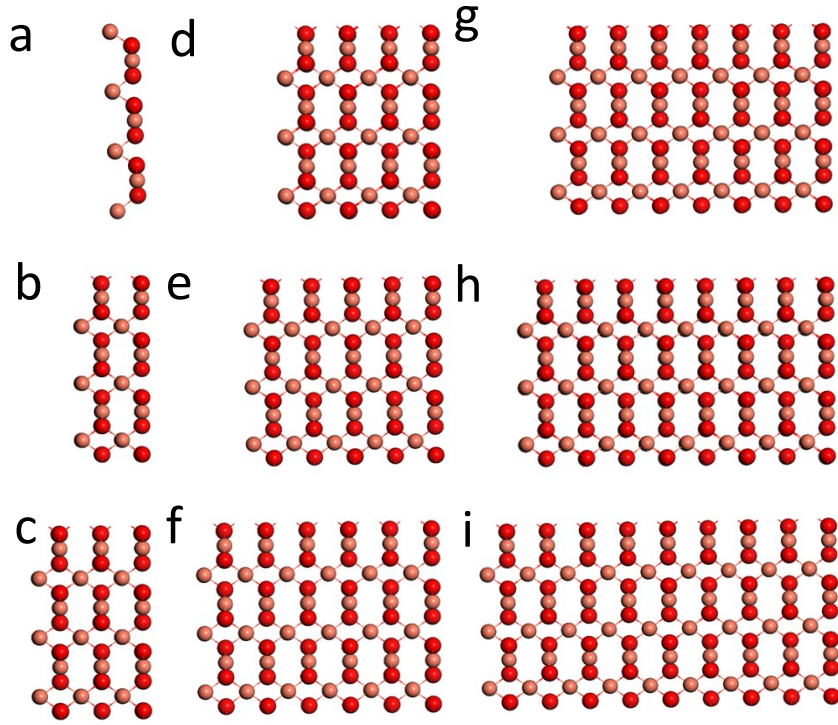

**Fig. S6** Slab structures of 1–9 layers of  $\text{Cu}_2\text{O}$  (110) planes.

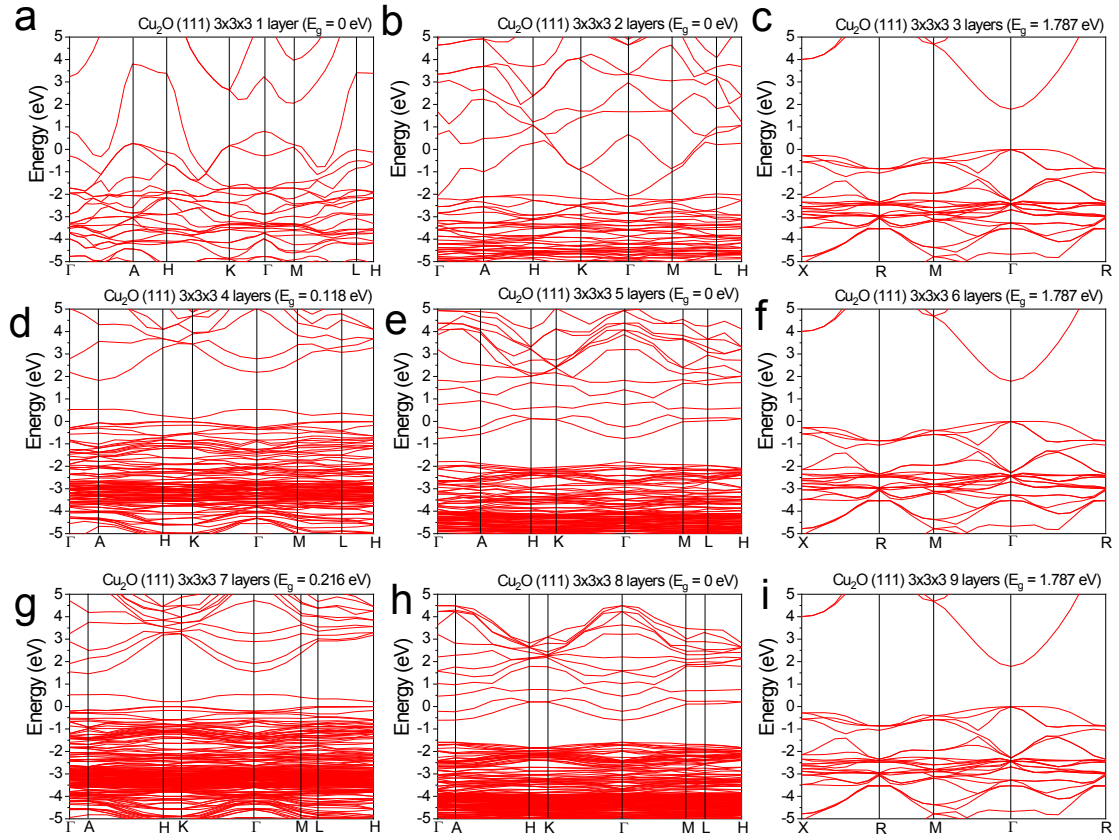

**Fig. S7** Band structures of (a) 1, (b) 2, (c) 3, (d) 4, (e) 5, (f) 6, (g) 7, (h) 8, and (i) 9 layers of  $\text{Cu}_2\text{O}$  (111) planes obtained using slabs from a  $3 \times 3 \times 3$   $\text{Cu}_2\text{O}$  supercell.

Only an energy range of 5 to  $-5$  eV is shown.

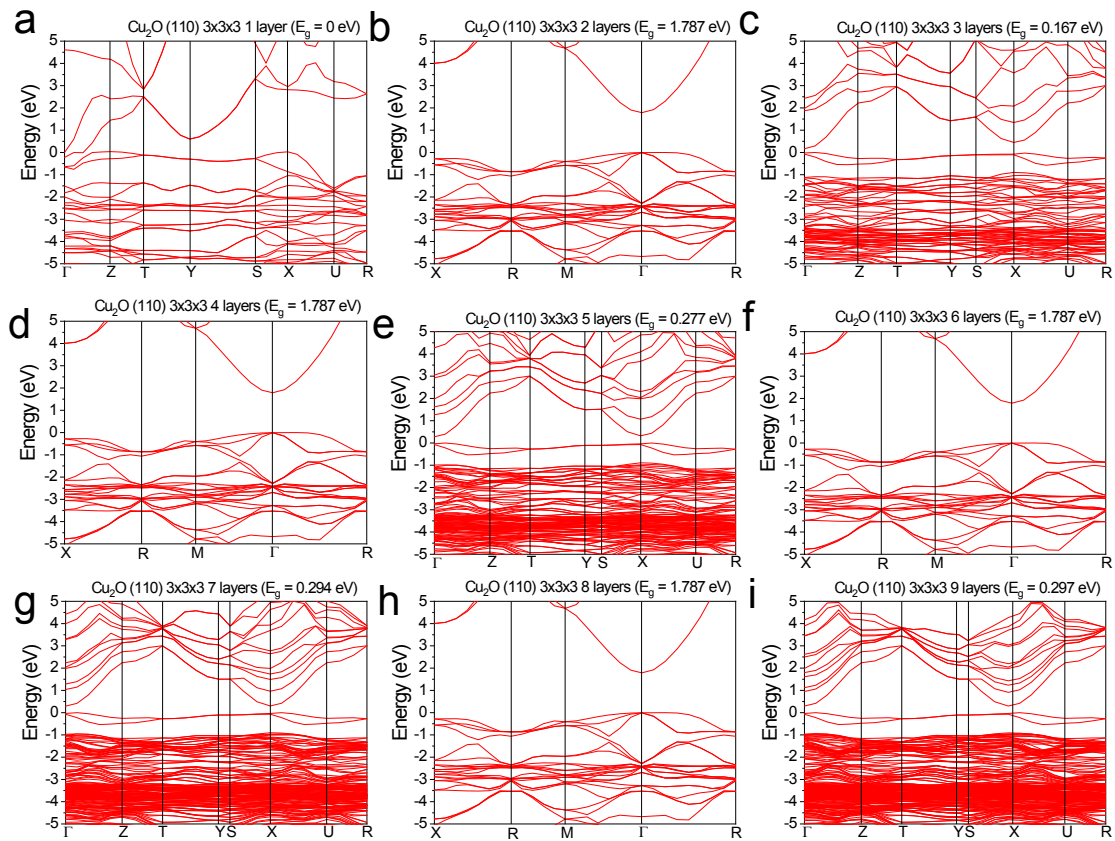

**Fig. S8** Band structures of (a) 1, (b) 2, (c) 3, (d) 4, (e) 5, (f) 6, (g) 7, (h) 8, and (i) 9 layers of  $\text{Cu}_2\text{O}$  (110) planes obtained using slabs from a  $3 \times 3 \times 3$   $\text{Cu}_2\text{O}$  supercell. Only an energy range of 5 to  $-5$  eV is shown.

**Table S2** Band gap variation with respect to the number of plane layers.

| Band gap (eV)                   | 1 layer | 2 layers | 3 layers | 4 layers | 5 layers | 6 layers | 7 layers | 8 layers | 9 layers |
|---------------------------------|---------|----------|----------|----------|----------|----------|----------|----------|----------|
| (111) slab from 5x5x5 supercell | 0       | 0        | 1.787    | 0.118    | 0        | 1.787    | 0.216    | 0        | 1.787    |
| (111) slab from 4x4x4 supercell | 0       | 0        | 1.787    | 0.118    | 0        | 1.787    | 0.216    | 0        | 1.787    |
| (111) slab from 3x3x3 supercell | 0       | 0        | 1.787    | 0.118    | 0        | 1.787    | 0.216    | 0        | 1.787    |
| (111) slab from 2x2x2 supercell | 0       | 0        | 1.787    | 0.118    | 0        | 1.787    | 0.216    | 0        | 1.787    |
| (111) slab from 1x1x1 supercell | 0       | 0        | 1.787    | 0.118    | 0        | 1.787    | 0.216    | 0        | 1.787    |
| (110) slab from 3x3x3 supercell | 0       | 1.787    | 0.167    | 1.787    | 0.277    | 1.787    | 0.294    | 1.787    | 0.297    |
| (100) slab from 3x3x3 supercell | 1.787   | 1.787    | 1.787    | 1.787    | 1.787    | 1.787    | 1.787    | 1.787    | 1.787    |

**Table S3**  $\text{Cu}_2\text{O}$  layer thicknesses vs. the number of plane layers.

| $\text{Cu}_2\text{O}$ layer thickness ( $\text{\AA}$ ) | 1 layer | 2 layers | 3 layers | 4 layers | 5 layers | 6 layers | 7 layers | 8 layers | 9 layers |
|--------------------------------------------------------|---------|----------|----------|----------|----------|----------|----------|----------|----------|
| (111)                                                  | 2.46    | 4.92     | 7.38     | 9.84     | 12.3     | 14.76    | 17.22    | 19.68    | 22.14    |
| (110)                                                  | 3.02    | 6.04     | 9.06     | 12.08    | 15.10    | 18.12    | 21.14    | 24.16    | 27.18    |
| (100)                                                  | 4.27    | 8.54     | 12.81    | 17.08    | 21.35    | 25.62    | 29.89    | 34.16    | 38.43    |

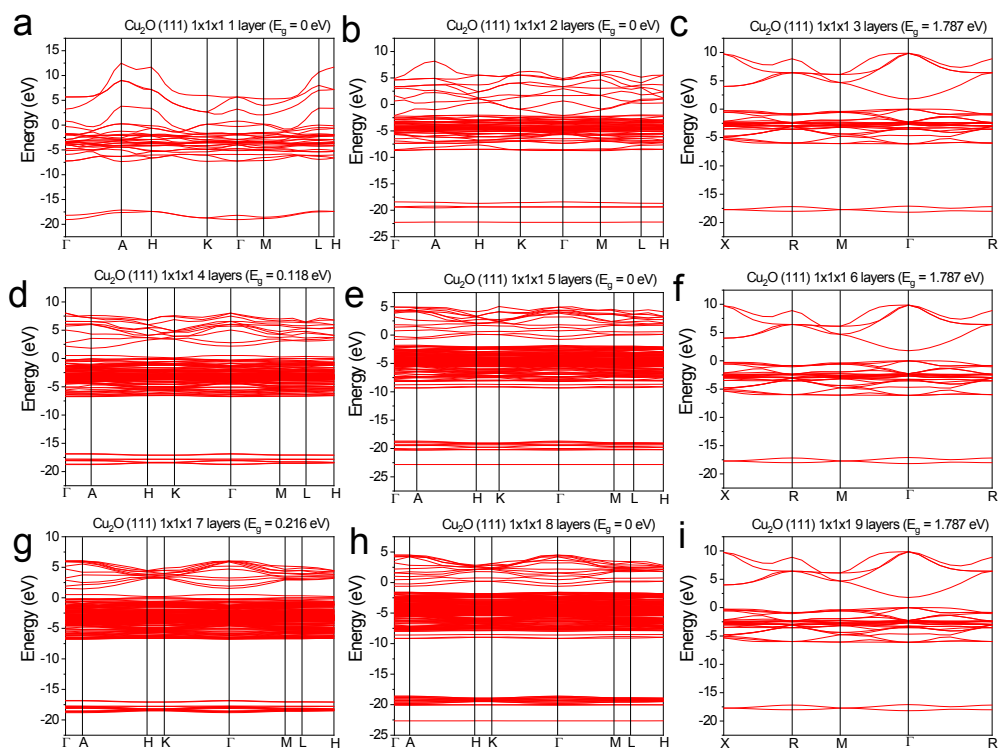

**Fig. S9** Band structures of (a) 1, (b) 2, (c) 3, (d) 4, (e) 5, (f) 6, (g) 7, (h) 8, and (i) 9 layers of  $\text{Cu}_2\text{O}$  (111) planes obtained using slabs from a  $1 \times 1 \times 1$   $\text{Cu}_2\text{O}$  supercell.



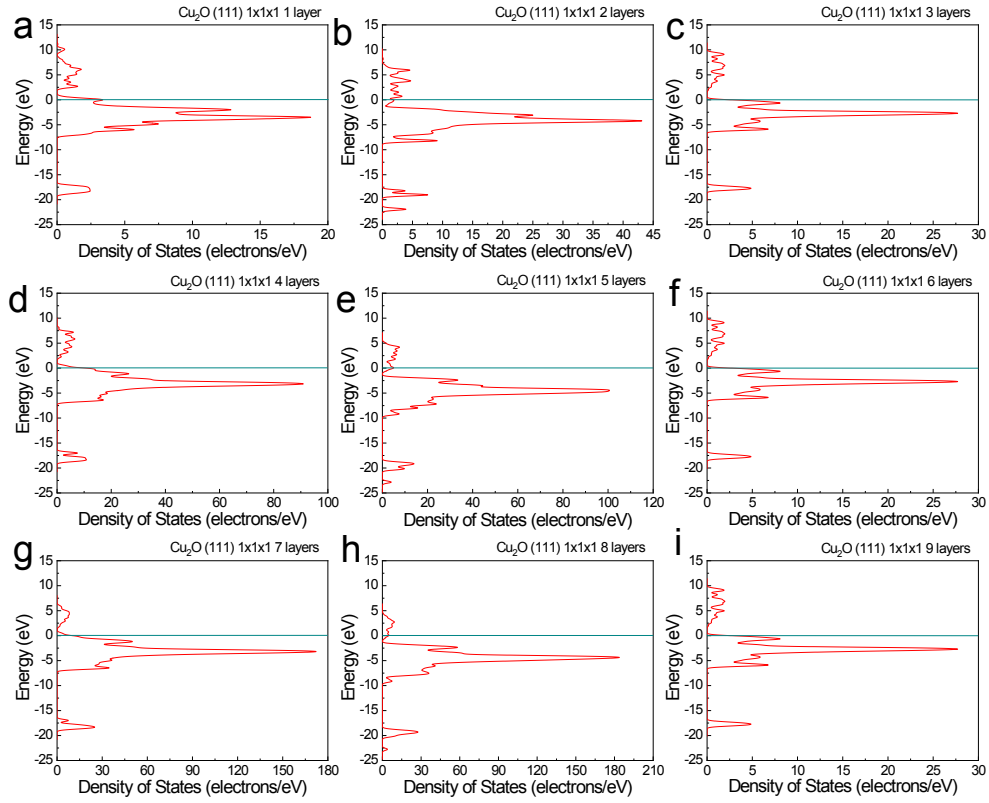

**Fig. S10** DOS diagrams of (a) 1, (b) 2, (c) 3, (d) 4, (e) 5, (f) 6, (g) 7, (h) 8, and (i) 9 layers of  $\text{Cu}_2\text{O}$  (111) planes obtained using slabs from a  $1 \times 1 \times 1$   $\text{Cu}_2\text{O}$  supercell.

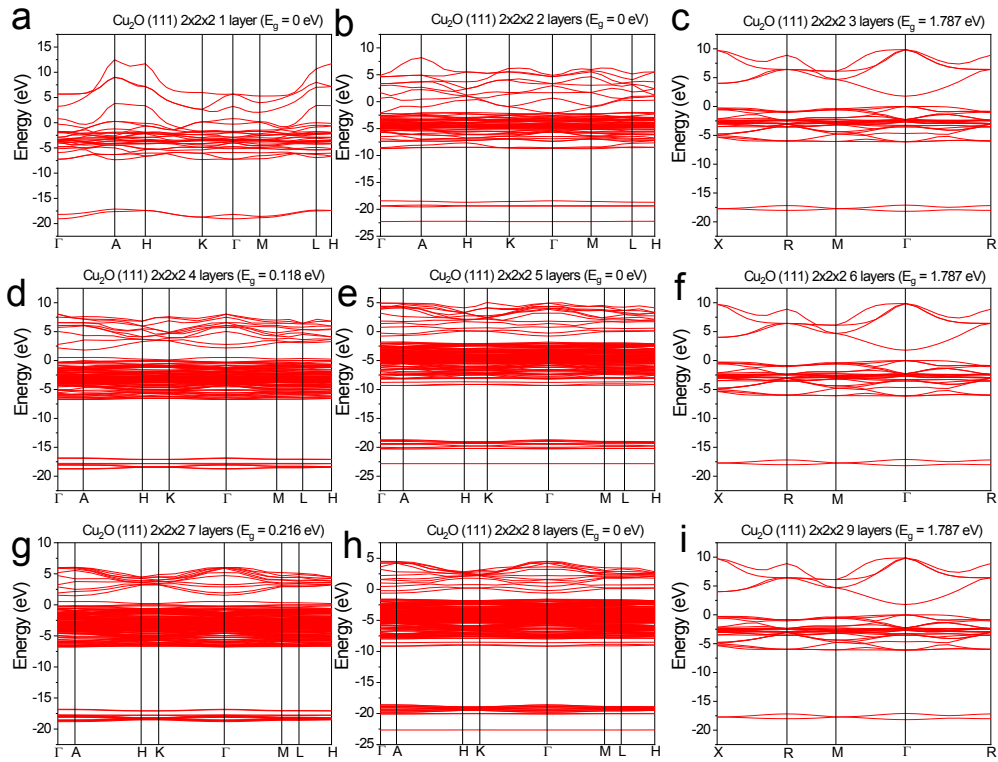

**Fig. S11** Band structures of (a) 1, (b) 2, (c) 3, (d) 4, (e) 5, (f) 6, (g) 7, (h) 8, and (i) 9 layers of  $\text{Cu}_2\text{O}$  (111) planes obtained using slabs from a  $2 \times 2 \times 2$   $\text{Cu}_2\text{O}$  supercell.

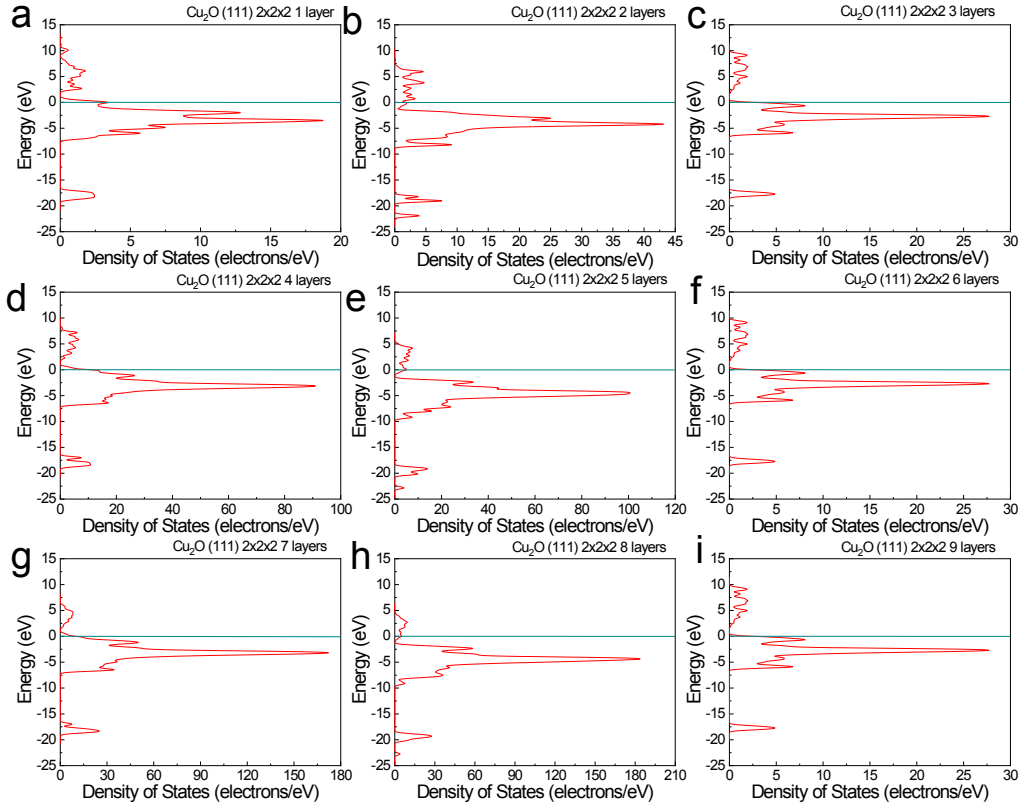

**Fig. S12** DOS diagrams of (a) 1, (b) 2, (c) 3, (d) 4, (e) 5, (f) 6, (g) 7, (h) 8, and (i) 9 layers of  $\text{Cu}_2\text{O}$  (111) planes obtained using slabs from a  $2 \times 2 \times 2$   $\text{Cu}_2\text{O}$  supercell.

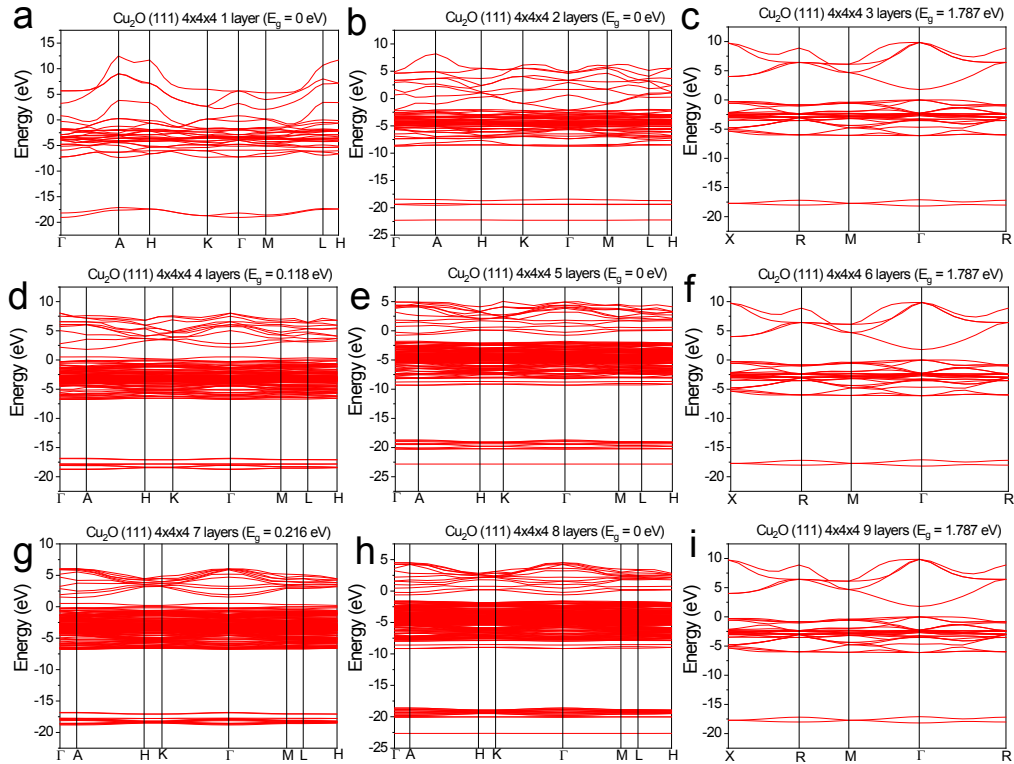

**Fig. S13** Band structures of (a) 1, (b) 2, (c) 3, (d) 4, (e) 5, (f) 6, (g) 7, (h) 8, and (i) 9 layers of  $\text{Cu}_2\text{O}$  (111) planes obtained using slabs from a  $4 \times 4 \times 4$   $\text{Cu}_2\text{O}$  supercell.

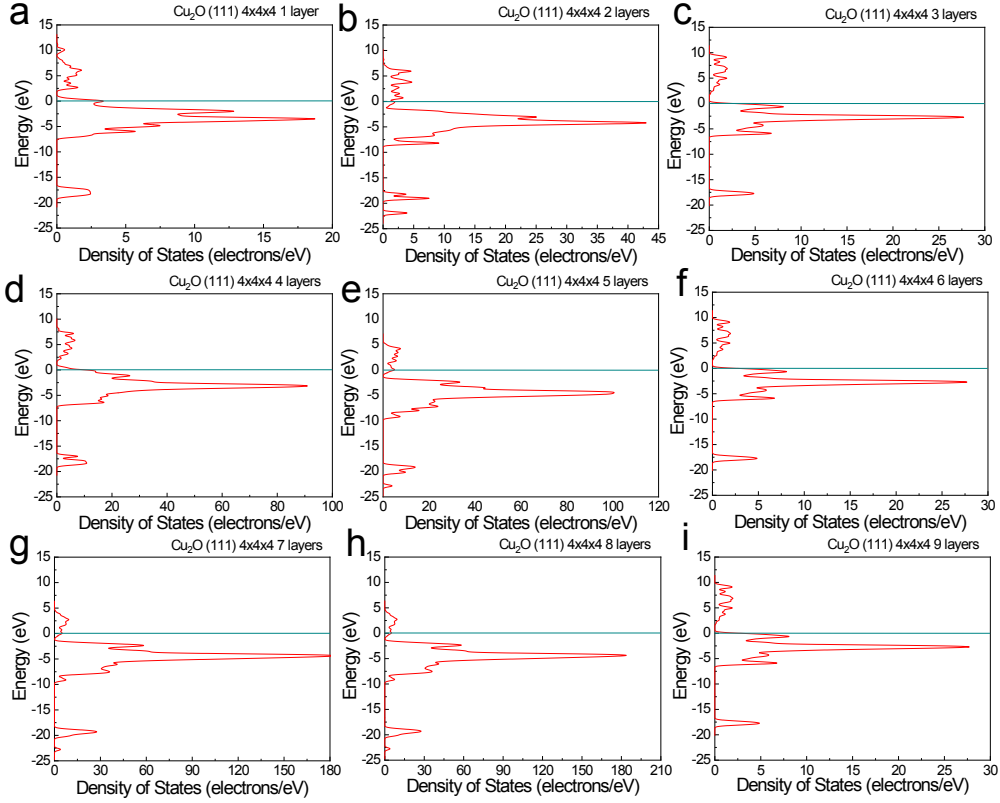

**Fig. S14** DOS diagrams of (a) 1, (b) 2, (c) 3, (d) 4, (e) 5, (f) 6, (g) 7, (h) 8, and (i) 9 layers of  $\text{Cu}_2\text{O}$  (111) planes obtained using slabs from a  $4 \times 4 \times 4$   $\text{Cu}_2\text{O}$  supercell.

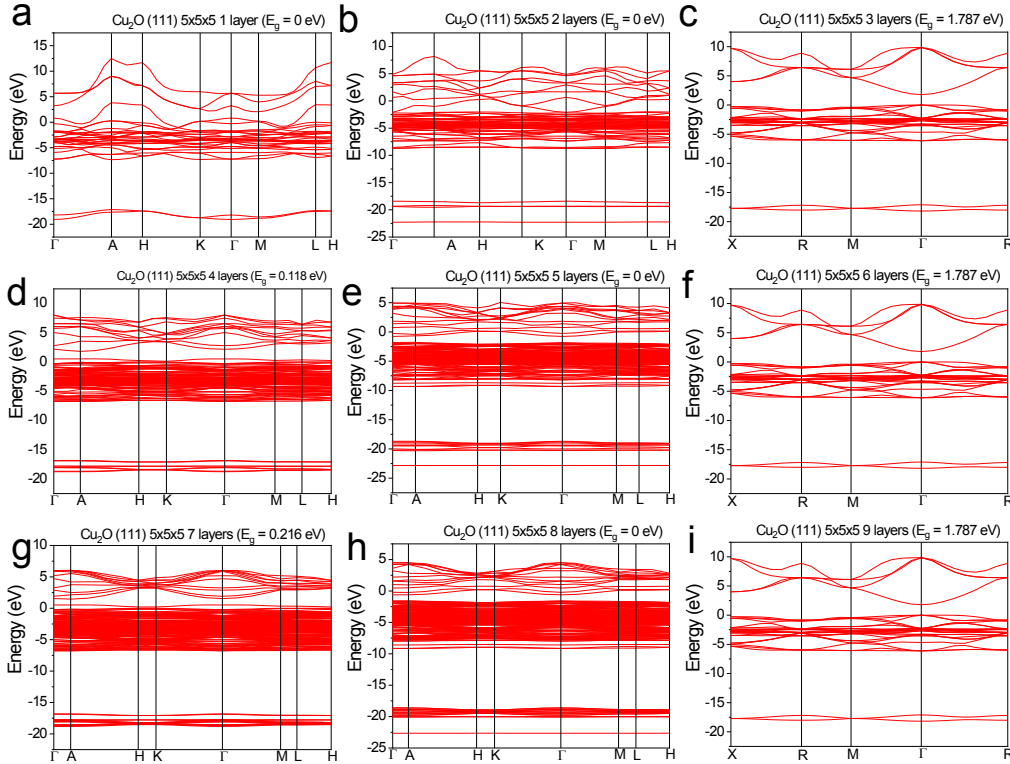

**Fig. S15** Band structures of (a) 1, (b) 2, (c) 3, (d) 4, (e) 5, (f) 6, (g) 7, (h) 8, and (i) 9 layers of  $\text{Cu}_2\text{O}$  (111) planes obtained using slabs from a  $5 \times 5 \times 5$   $\text{Cu}_2\text{O}$  supercell.

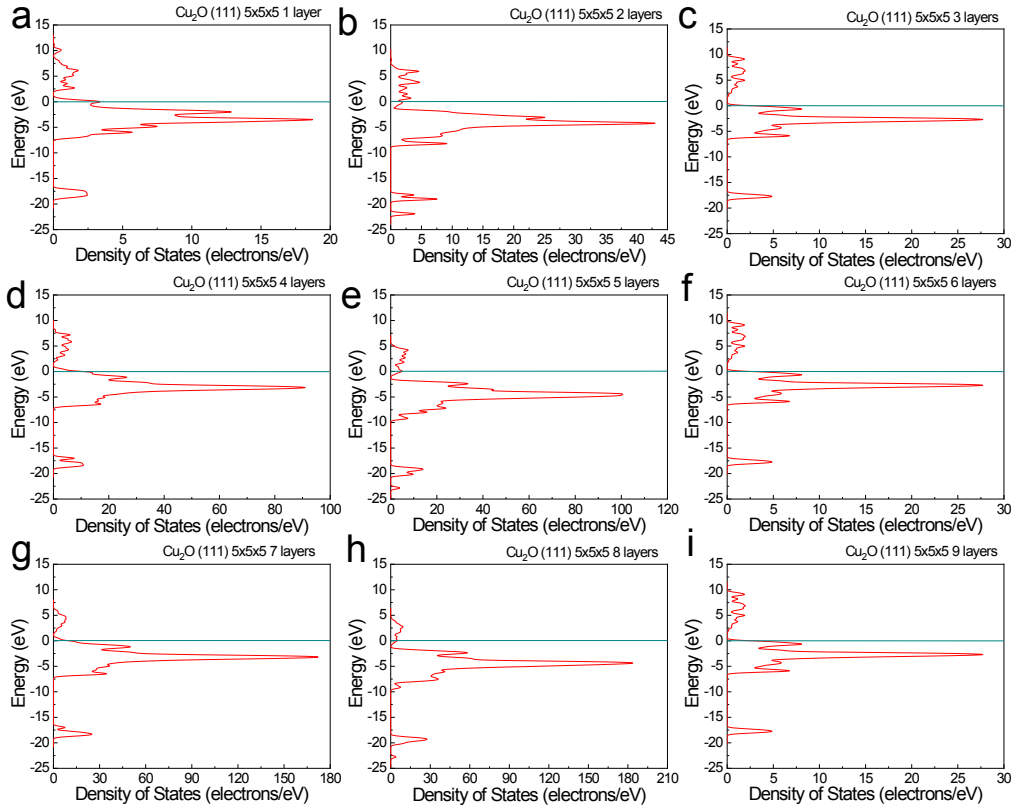

**Fig. S16** DOS diagrams of (a) 1, (b) 2, (c) 3, (d) 4, (e) 5, (f) 6, (g) 7, (h) 8, and (i) 9 layers of  $\text{Cu}_2\text{O}$  (111) planes obtained using slabs from a  $5 \times 5 \times 5$   $\text{Cu}_2\text{O}$  supercell.

**Table S4** Average Cu–O bond length variation with respect to the number of plane layers.

| Cu-O average bond length ( $\text{\AA}$ )        | 1 layer | 2 layers | 3 layers | 4 layers | 5 layers | 6 layers | 7 layers | 8 layers | 9 layers |
|--------------------------------------------------|---------|----------|----------|----------|----------|----------|----------|----------|----------|
| (111) slab from $5 \times 5 \times 5$ super cell | 1.88    | 1.88     | 1.85     | 1.84     | 1.86     | 1.85     | 1.85     | 1.86     | 1.85     |
| (111) slab from $4 \times 4 \times 4$ super cell | 1.88    | 1.88     | 1.85     | 1.84     | 1.86     | 1.85     | 1.85     | 1.86     | 1.85     |
| (111) slab from $3 \times 3 \times 3$ super cell | 1.88    | 1.88     | 1.85     | 1.84     | 1.86     | 1.85     | 1.85     | 1.86     | 1.85     |
| (111) slab from $2 \times 2 \times 2$ super cell | 1.88    | 1.88     | 1.85     | 1.84     | 1.86     | 1.85     | 1.85     | 1.86     | 1.85     |
| (111) slab from $1 \times 1 \times 1$ super cell | 1.88    | 1.88     | 1.85     | 1.84     | 1.86     | 1.85     | 1.85     | 1.86     | 1.85     |
| (110) slab from $3 \times 3 \times 3$ super cell | 1.93    | 1.85     | 1.87     | 1.85     | 1.87     | 1.85     | 1.87     | 1.85     | 1.86     |
| (100) slab from $3 \times 3 \times 3$ super cell | 1.85    | 1.85     | 1.85     | 1.85     | 1.85     | 1.85     | 1.85     | 1.85     | 1.85     |

**Table S5** Cu–O bond distortion percentages with respect to the number of plane layers.

| Cu–O bond distortion (%)         | 1 layer | 2 layers | 3 layers | 4 layers | 5 layers | 6 layers | 7 layers | 8 layers | 9 layers |
|----------------------------------|---------|----------|----------|----------|----------|----------|----------|----------|----------|
| (111) Slab from 5x5x5 super cell | 1.684   | 1.828    | 0        | -0.278   | 0.700    | 0        | 0.018    | 0.485    | 0        |
| (111) Slab from 4x4x4 super cell | 1.684   | 1.830    | 0        | -0.277   | 0.606    | 0        | 0.019    | 0.451    | 0        |
| (111) Slab from 3x3x3 super cell | 1.683   | 1.828    | 0        | -0.279   | 0.445    | 0        | 0.023    | 0.394    | 0        |
| (111) Slab from 2x2x2 super cell | 1.684   | 1.836    | 0        | -0.279   | 0.716    | 0        | 0.023    | 0.479    | 0        |
| (111) Slab from 1x1x1 super cell | 1.684   | 1.829    | 0        | -0.278   | 0.652    | 0        | 0.019    | 0.440    | 0        |
| (110) Slab from 3x3x3 super cell | 4.276   | 0        | 1.059    | 0        | 1.353    | 0        | 0.973    | 0        | 0.697    |
| (100) Slab from 3x3x3 super cell | 0       | 0        | 0        | 0        | 0        | 0        | 0        | 0        | 0        |

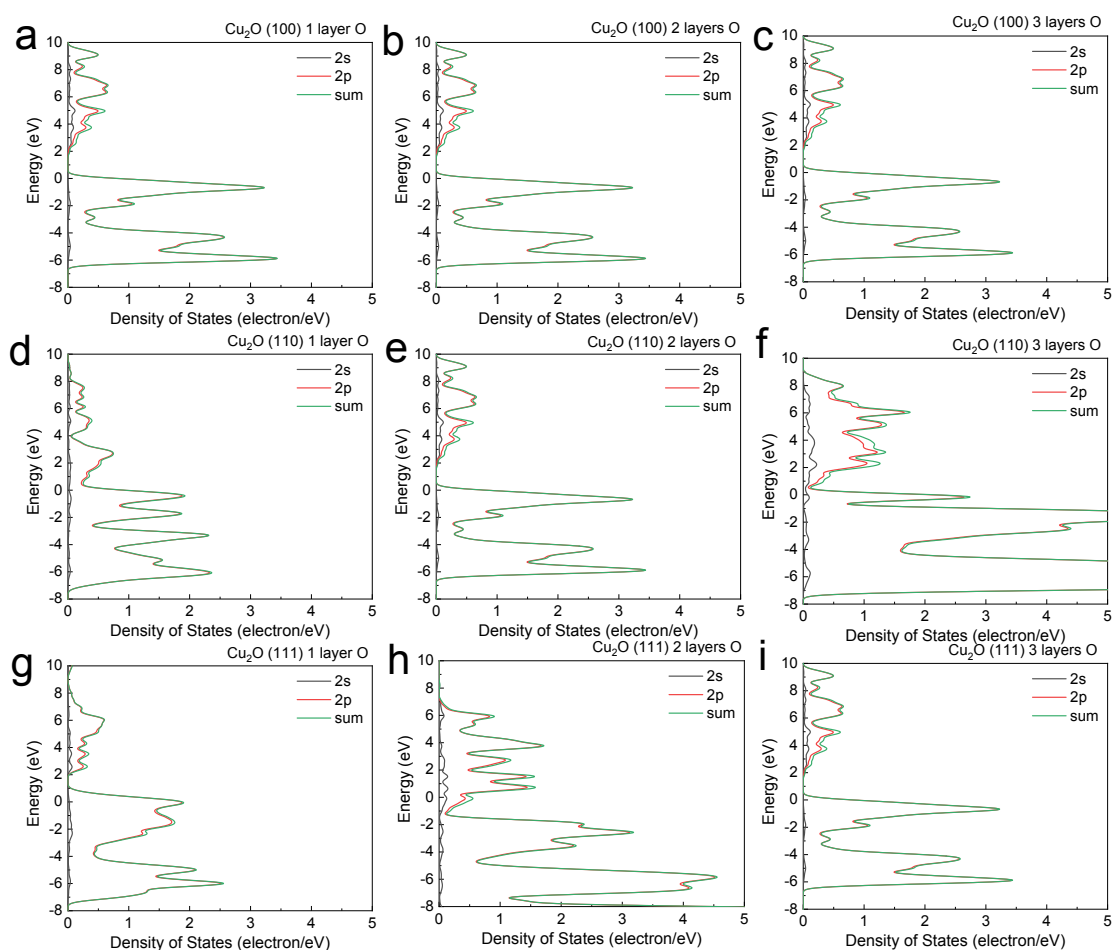

**Fig. S17** Partial DOS diagrams of 1–3 layers of Cu<sub>2</sub>O (a–c) (100), (d–e) (110), and (g–i) (111) planes showing the contributions by the frontier orbitals of oxygen atoms.
